# A Systematic Review and Meta-Analysis of Hypoglycemia and Cardiovascular Events

A comparison of glyburide with other secretagogues and with insulin

AZIM S. GANGJI, MD, FRCPC<sup>1,2</sup>  
TALI CUKIERMAN, MD<sup>2,3</sup>  
HERTZEL C. GERSTEIN, MD, FRCPC<sup>2,3</sup>

CHARLES H. GOLDSMITH, PHD<sup>2</sup>  
CATHERINE M. CLASE, MB, FRCPC<sup>1,2</sup>

**OBJECTIVE** — Glyburide is the most widely used sulfonylurea but has unique pharmacodynamic properties that may increase harm. We hypothesized that glyburide causes more hypoglycemia and cardiovascular events than other secretagogues or insulin.

**RESEARCH DESIGN AND METHODS** — Data sources were Medline, Embase, Cochrane, and three other web-based clinical trial registers (1966–2005). Parallel, randomized, controlled trials in people with type 2 diabetes comparing glyburide monotherapy with monotherapy using secretagogues or insulin were selected. Outcomes were hypoglycemia, glycemic control, cardiovascular events, body weight, and death. Titles and abstracts of 1,806 publications were reviewed in duplicate and 21 relevant articles identified. Data on patient characteristics, interventions, outcomes, and validity were extracted in duplicate using predefined criteria.

**RESULTS** — Glyburide was associated with a 52% greater risk of experiencing at least one episode of hypoglycemia compared with other secretagogues (relative risk 1.52 [95% CI 1.21–1.92]) and with 83% greater risk compared with other sulfonylureas (1.83 [1.35–2.49]). Glyburide was not associated with an increased risk of cardiovascular events (0.84 [0.56–1.26]), death (0.87 [0.70–1.07]), or end-of-trial weight (weighted mean difference 1.69 kg [95% CI –0.41 to 3.80]) compared with other secretagogues. Limitations included suboptimal reporting of original trials. Loss to follow-up exceeded 20% in some studies, and major hypoglycemia was infrequently reported.

**CONCLUSIONS** — Glyburide caused more hypoglycemia than other secretagogues and other sulfonylureas. Glyburide was not associated with an increased risk of cardiovascular events, death, or weight gain.

*Diabetes Care* 30:389–394, 2007

The global prevalence of diagnosed type 1 and 2 diabetes was estimated to be 2.8% in 2000 and projected to be 4.4% by 2030 (1). The UK Prospective Diabetes Study (UKPDS) showed that improving glycemic control reduced long-term microvascular complications (2). However, intensive therapy increases the

risk for severe hypoglycemia, which is associated with mortality and morbidity (3,4).

Sulfonylurea drugs bind the sulfonylurea receptor, an ATP-sensitive K<sup>+</sup> channel, and inhibit potassium efflux, which facilitates insulin secretion (5). Compared with placebo, they reduce A1C levels by

1–2% (6). Differences in chemical structure, pharmacokinetic, and pharmacodynamic properties between sulfonylureas may lead to differences in the rates of hypoglycemic reactions. Glyburide (called glibenclamide in Europe), the most widely used sulfonylurea (7), has a relatively long terminal half-life in chronic dosing compared with other sulfonylureas, owing to its high affinity for the  $\beta$ -cell sulfonylurea receptor and the accumulation of active metabolites that are excreted through the kidney (7). Several observational studies have reported increased rates of hypoglycemia with the use of glyburide compared with other sulfonylureas (3,4). A systematic review of randomized controlled trials (RCTs) evaluating the risk for hypoglycemia associated with the use of glyburide has not, to our knowledge, been previously conducted.

The University Group Diabetes Program (UGDP) RCT (8) noted excess cardiac deaths in patients treated with tolbutamide; whether this was attributable to higher baseline cardiac risk in the patients allocated to tolbutamide or to a true biological effect has been widely debated. Consistent with the findings of the UGDP study, experimental laboratory data have suggested that sulfonylureas, particularly glyburide, might increase the risk of cardiovascular events. During coronary angioplasty, with each subsequent balloon dilatation, the extent of ST segment depression decreases and the time to onset of ST depression and the time to onset of angina increase. This phenomenon, known as ischemic preconditioning, is thought also to occur in acute coronary syndromes. Sulfonylurea-induced potassium efflux has been shown to reduce cardiac ischemic preconditioning in animal studies (9). In humans undergoing coronary angioplasty, the infusion of glimepiride has the same effect on ST depression and time to onset of angina as placebo, whereas the infusion of glyburide leads to a reduction in each of the effects of preconditioning (10).

This systematic overview of randomized controlled trials in people with type 2 diabetes was conducted to determine

From the <sup>1</sup>Division of Nephrology, McMaster University and St. Joseph's Healthcare, Hamilton, Ontario, Canada; the <sup>2</sup>Department of Clinical Epidemiology and Biostatistics, McMaster University, Hamilton, Ontario, Canada; and the <sup>3</sup>Division of Endocrinology & Metabolism and Population Health Research Institute, McMaster University and Hamilton Health Sciences, Hamilton, Ontario, Canada.

Address correspondence and reprint requests to Catherine M. Clase, 708-25 Charlton Ave. East, Hamilton, Ontario L8P 3P7, Canada. E-mail: clase@mcmaster.ca.

Received for publication 23 August 2006 and accepted in revised form 12 November 2006.

Additional information for this article can be found in an online appendix at <http://dx.doi.org/10.2337/dc06-1789>.

**Abbreviations:** FPG, fasting plasma glucose; RCT, randomized controlled trial; UKPDS, UK Prospective Diabetes Study; WMD, weighted mean difference.

A table elsewhere in this issue shows conventional and Système International (SI) units and conversion factors for many substances.

DOI: 10.2337/dc06-1789

© 2007 by the American Diabetes Association.

The costs of publication of this article were defrayed in part by the payment of page charges. This article must therefore be hereby marked "advertisement" in accordance with 18 U.S.C. Section 1734 solely to indicate this fact.

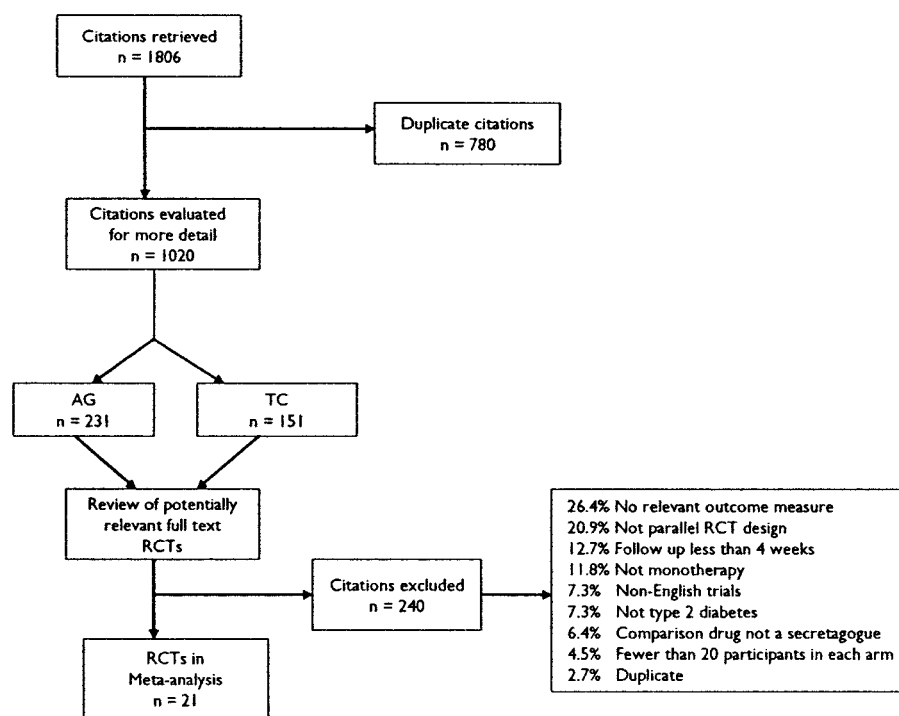

**Figure 1**—Study flow diagram. AG, Azim S. Gangji; TC, Tali Cukierman.

whether people taking glyburide are at increased risk for hypoglycemia or cardiovascular events compared with those taking other secretagogues (other sulfonylureas and meglitinides) or those taking insulin. For completeness of our analysis of important harms, we also examined weight gain.

## RESEARCH DESIGN AND METHODS

We followed the recommendations of the Quality of Reporting of Meta-Analyses (QUOROM) conference (online appendix 1 [available at <http://dx.doi.org/10.2337/dc06-1789>]) (11).

### Search strategy

We searched biomedical databases (Medline, Embase, the Cochrane library, clinicaltrials.gov, controlled-trials.com, and the U.K. national register of RCTs) and the bibliographies of relevant and review articles for reports of RCTs comparing glyburide with other secretagogues or with insulin. In Medline and Embase the searches combined generic and brand names of glyburide with key words specifying RCTs according to the strategy recommended by the Cochrane collaboration (online appendix 2) (12).

Two authors (A.S.G. and T.C.) independently reviewed this initial list (Fig. 1). Full text was obtained for all poten-

tially appropriate articles and each was reviewed independently for eligibility.

### Study selection

Eligible studies 1) described people with type 2 diabetes; 2) compared glyburide monotherapy with monotherapy using other sulfonylureas, meglitinides, or insulin; 3) reported one or more of the following outcomes: hypoglycemia (major, minor, or all), cardiovascular events, or weight change; 4) described a parallel design RCT; and 5) were written in English. For hypoglycemia and cardiovascular events, we accepted the definition or outcome cluster reported in the original manuscript. Cardiovascular events included incident myocardial infarction, stroke, amputation, episodes of congestive heart failure, or cardiovascular death. Where multiple outcomes were reported, we selected the cluster that most closely matched the definition above. If no cluster was reported, we selected the single outcome we thought best represented cardiovascular outcomes. We excluded studies with <20 participants in each arm or a follow-up of <4 weeks. If studies were reported in more than one publication, we extracted data from the most recent article that met the inclusion criteria using data from related publications when necessary.

We used  $\kappa$ -statistics to express the ex-

tent of agreement between reviewers. Disagreements were resolved by consensus.

### Validity assessment

We assessed validity in duplicate using the following criteria: 1) method of randomization, 2) presence of allocation concealment, 3) blinding, 4) loss to follow-up, and 5) reporting of an intention-to-treat analysis.

### Data abstraction

For each study, we abstracted, in duplicate: 1) inclusion and exclusion criteria; 2) baseline characteristics for the different treatment arms, including the number of participants at the start of the study; 3) the intervention and comparator (including dose, frequency, target A1C, and A1C achieved); 4) follow-up period and number of participants at study completion; and 5) the definitions used to report hypoglycemia and cardiovascular events. For each treatment arm we abstracted: 1) all episodes of hypoglycemia (number of participants with one or more episodes and number of episodes per unit of person-time), 2) number of episodes of major and minor hypoglycemia, 3) number of cardiovascular events, 4) number of deaths from any cause, and 5) weight change and end-of-trial weight. When the study included more than two arms, we chose the comparator with the largest number of people.

### Data analysis

We summarized studies that compared glyburide with other secretagogues separately from studies that compared glyburide with insulin. Because of the unique pharmacokinetic and pharmacodynamic properties of glyburide, we prespecified a subgroup analysis comparing glyburide with other sulfonylureas.

We assessed patient characteristics, interventions, and outcomes for clinical heterogeneity and used the  $I^2$  statistic to quantify the proportion of total variation that was due to statistical heterogeneity. We calculated relative risk (RR) and 95% CIs to summarize the effect size for dichotomous outcomes (number of participants with at least one hypoglycemic event, number of major and all hypoglycemic events, cardiovascular events, and overall mortality), and rate ratios and 95% CIs were calculated for event rates. For continuous data, we calculated the weighted mean difference (WMD) for each study and summarized this as an

overall WMD and 95% CI. We used random effects assumptions throughout.

To assess for publication bias, we constructed a funnel plot of the SE of the log of the RR plotted against the RR for experiencing at least one episode of hypoglycemia.

We used MetaView 4.2 in Cochrane Review Manager 4.2 (Cochrane Collaboration, Oxford, U.K.) and Comprehensive Meta-Analysis 2.2 (Biostat, Englewood, NJ).  $P < 0.05$  was considered statistically significant, and an  $I^2$  value of  $>50\%$  indicated excess statistical heterogeneity.

## RESULTS

### Search

We identified 1,806 publications, of which 21 articles describing 20 studies were relevant (Fig. 1) (2,13–32). Estimated  $\kappa$  for agreement on relevance was 0.86 (95% CI 0.81–0.91). Of the 21 articles, 12 compared glyburide with an oral hypoglycemic agent and reported this as patients experiencing at least one episode of hypoglycemia (13,15–17,20,21,23, 25–27,29,30); an additional 3 articles only reported total number of hypoglycemic episodes (14,18,19); 3 articles compared glyburide with insulin (22, 27,31); and 3 studies only reported a change in weight (24,28,32).

### Validity assessment

Five of the 21 studies described the method of randomization (2,14,22, 30,33); 3 of these used a computer generated method (2,22,27). The method of allocation concealment was described only in the UKPDS trial, which used consecutive opaque envelopes. Seven studies reported blinding of participants and caregivers (13,15,16,19–21,25). The UKPDS study reported that there was blinding of outcome assessors and data analyzers (2).

Twelve of the 21 studies reported the use of an intent-to-treat analysis (13,15–17,20,21,23,25–27,29,30). Loss to follow-up was reported in 19 studies (2,14–23,25–32). There was a large amount of variability (0–37%) in the percentage of patients lost to follow-up. Reasons for loss to follow-up included inadequate glycemic control, hypoglycemia, other adverse events, noncompliance, and moving out of the study area.

### Study characteristics

Included studies reported on 7,047 people with follow-up periods from 1 month

to 10 years. Some of the studies specified the target A1C or fasting plasma glucose (FPG) to be achieved. Though this value varied widely between studies, the target level was always identical for the two arms within each study (2,14–16,18,20–23,25,27,28). Hypoglycemia was defined as symptoms (without a threshold glucose level) in some studies and in others as symptoms coexisting with low capillary blood glucose levels (minimum threshold 48 mg/dl [2.7 mmol/l], maximum 63 mg/dl [3.5 mmol/l]). Major hypoglycemia was defined as an episode requiring assistance or hospital admission. Details of study characteristics and study validity are available in the online appendix (Tables A and B).

### Quantitative data synthesis

Table 1 provides a summary of effect sizes, 95% CIs, and  $I^2$  values for the meta-analyses of harms.

### Hypoglycemia and glycemic control

Figure 2 shows a 52% greater risk of experiencing at least one episode of hypoglycemia for participants receiving glyburide compared with those receiving other secretagogues (RR 1.52 [95% CI 1.21–1.92]). In the planned subgroup analysis comparing glyburide with other sulfonylureas, glyburide was associated with an 83% higher risk of causing at least one episode of hypoglycemia (1.83 [1.35–2.49]).

Five studies compared glyburide with other secretagogues and reported their results as total number of hypoglycemic episodes (14,15,19,20,26) (Table 1). These studies were heterogeneous ( $I^2$  76.8%). There was an 80% higher rate of hypoglycemic episodes with glyburide (rate ratio 1.80 [95% CI 1.06–3.09]) compared with other secretagogues. Limiting the analysis to studies comparing glyburide with other sulfonylureas led to a decrease in heterogeneity to within acceptable limits ( $I^2$  17.6%); the increased risk associated with glyburide compared with other sulfonylureas was 44% (1.44 [1.13–1.85]) (14,15). Two studies, both using a sulfonylurea as a comparator (14,15), reported major hypoglycemic episodes. The risk of major hypoglycemic events was over four times higher for glyburide compared with other sulfonylureas (4.69 [0.78–28.08]); however, this was not statistically significant.

Studies reporting A1C were all comparisons of glyburide with sulfonylureas; no significant difference was identified

**Table 1—Summary of risk of hypoglycemia, cardiovascular events, death, and weight change: glyburide compared with all secretagogues, sulfonylureas, or insulin**

| Comparator        | Patients with any hypoglycemic episode [RR (95% CI) $I^2$ ] | Patients with a major hypoglycemic episode [RR (95% CI) $I^2$ ] | All hypoglycemic episodes per patient-year [rate ratio (95% CI) $I^2$ ] | Major hypoglycemic episodes per patient-year [rate ratio (95% CI) $I^2$ ] | Cardiovascular events [RR (95% CI) $I^2$ ] | Death [RR (95% CI) $I^2$ ] | Weight gain (kg) [WMD (95% CI) $I^2$ ] |
|-------------------|-------------------------------------------------------------|-----------------------------------------------------------------|-------------------------------------------------------------------------|---------------------------------------------------------------------------|--------------------------------------------|----------------------------|----------------------------------------|
| All secretagogues | 1.52 (1.21–1.92) 42.1%                                      | ND                                                              | 1.80 (1.06–3.09) 76.8%*                                                 | ND                                                                        | 0.84 (0.56–1.26) 12.6%                     | 0.87 (0.70–1.07) 0%        | 1.69 (–0.41 to 3.80) 31.4%             |
| Sulphonylureas    | 1.83 (1.35–2.49) 43.4%                                      | ND                                                              | 1.44 (1.13–1.85) 17.6%                                                  | 4.69 (0.78–28.08) 0%                                                      | 0.92 (0.71–1.19) 0%                        | 0.79 (0.47–1.32) 33.7%     | 2.49 (–0.48 to 5.47) 4.9%              |
| Insulin           | 0.88 (0.25–3.06) 92.5%*                                     | ND                                                              | 0.089 (0.019–0.408) 83.1%*                                              | ND                                                                        | 0.89 (0.70–1.14) NA†                       | 0.97 (0.79–1.20) NA†       | –2.28 (–2.42 to –2.14) 0%              |

\*Estimate unreliable due to heterogeneity. †No data on cardiovascular outcome clusters but data on myocardial infarction extracted from single study (UKPDS 33). ‡Data from single study (UKPDS 33). NA, not applicable; ND, no data.

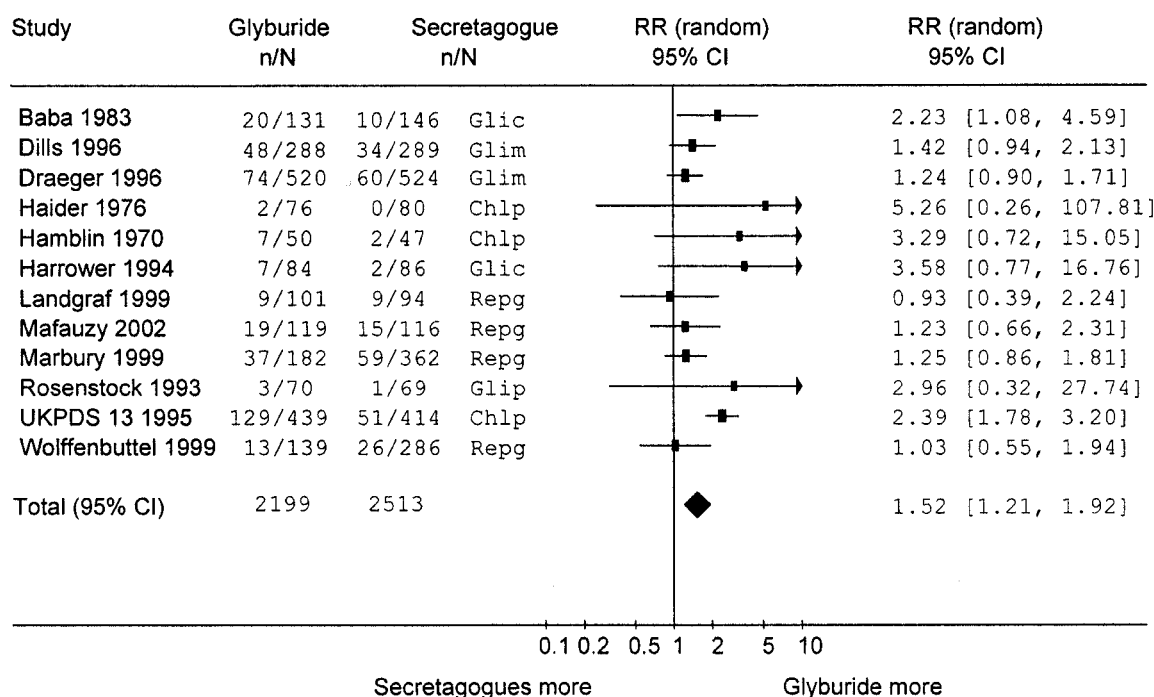

**Figure 2**—RR for experiencing at least one hypoglycemic episode: glyburide versus other secretagogues. Chlp, chlorpropamide; Glic, glizide; Glim, glimepiride; Glip, glipizide; Repq, repaglinide.

(A1C WMD  $-0.13\%$  [95% CI  $-0.52$  to  $0.26$ ;  $I^2$  43.7%]). Reports of FPG comparing glyburide with other secretagogues were heterogeneous (WMD  $-0.49$  mmol/l [95% CI  $-1.15$  to  $0.18$ ;  $I^2$  97.9%]). Heterogeneity was not present in the analysis comparing FPG for glyburide with other sulfonylureas. There was a small effect in the direction of improved FPG with glyburide (WMD  $-0.34$  mmol/l [95% CI  $-0.40$  to  $-0.27$ ;  $I^2$  0%]).

Three studies (1,339 participants) showed that the risk of hypoglycemia was similar for people treated with glyburide and those treated with insulin, though CIs were wide (RR 0.88 [95% CI 0.25–3.06]) (22,27,31).

### Weight change and end-of-trial weight

End-of-trial weight was reported in three studies of 498 people comparing glyburide with other secretagogues (25,27,30). Overall, glyburide did not cause an increase in weight compared with other secretagogues (WMD 1.69 kg [95% CI  $-0.41$  to  $3.80$ ]). However, in the three studies of 1,840 people comparing glyburide with insulin, body weight increased by 2.28 kg more in people treated with insulin than in those treated with

glyburide (WMD  $-2.28$  kg [ $-2.42$  to  $-2.14$ ]) (2,18,22).

### Cardiovascular events and overall mortality

Cardiovascular events were reported in three studies including 2,822 participants (2,15,21). There was no significant difference between glyburide and secretagogues (RR 0.84 [95% CI 0.56–1.26]). The same three studies reported no significant difference in overall mortality (0.87 [0.70–1.07]). There were no studies that reported a cardiovascular outcome cluster for glyburide compared with insulin. However, the UKPDS 33 (2) study reported data from which the RR of myocardial infarction for glyburide compared with insulin could be calculated: RR 0.89 (95% CI 0.70–1.14). One study (UKPDS 33) reported data from which mortality for glyburide compared with insulin could be calculated: 0.97 (0.79–1.20).

### Assessment of publication bias

Visual inspection of the funnel plot of the outcome “number of participants experiencing at least one hypoglycemic episode” demonstrated a paucity of studies with large SEs to the left of the overall estimate (available from the authors upon request).

**CONCLUSIONS** — The main findings of this meta-analysis are that glyburide caused more hypoglycemia than other secretagogues and more hypoglycemia than other sulfonylureas. In the meta-analysis of the two studies that reported major hypoglycemia, there was a trend toward a greater number of events in patients treated with glyburide than with other sulfonylureas. The direction of effect was consistent in all analyses (Table 1). UKPDS 33 reported the percentage of patients per year with one or more episodes and with one or more major episodes of hypoglycemia. Although we were unable to include these results in our meta-analysis because of the method of reporting, our results (glyburide vs. other sulfonylureas RR 1.83 [95% CI 1.35–2.49]) are consistent with the findings of UKPDS 33, in which the mean percentage of patients per year with one or more episodes of hypoglycemia was 17.7% for glyburide and 11.0% for chlorpropamide (RR 1.61), and the mean percentage of patients per year with one or more major hypoglycemic episodes was 0.6% for glyburide and 0.4% for chlorpropamide (RR 1.50).

We did not find a difference in A1C between patients treated with glyburide and those treated with other sulfonyl-



ureas; however, there was a small, statistically significant difference of questionable clinical importance in the comparison of FPG between these two groups. On the evidence of the A1C results, it seems unlikely that improved glycemic control accounts for the increase in hypoglycemia observed.

We did not find any difference in risk for hypoglycemia of glyburide compared with insulin. CIs for this estimate are wide, so a difference cannot be excluded. Other reasons for finding no difference include: 1) inadequate titration of insulin toward achieving glucose control (in one of the studies included in this review, the achieved end-of-trial A1C in the insulin arm was 8.5% [22]), 2) the small dose adjustments possible with insulin that are not possible with an oral agent, or 3) that the difference is minimized in patients with newly diagnosed disease who predominated in our analysis.

Though data from animal and human studies suggest that glyburide might exacerbate coronary ischemia more than other secretagogues and specifically more than other sulfonylureas (10), the meta-analysis of cardiovascular events and deaths provided no support for the hypothesis that these effects lead to adverse cardiovascular outcomes. In addition, weight gain with glyburide was similar to that observed with other sulfonylureas and less than that observed with insulin.

### Methodological limitations

**Limitations of the included studies.** The method of randomization and allocation were seldom described in the studies reported here. Lack of allocation concealment may significantly influence observed treatment effects (34).

There was great variability between studies in the loss to follow-up, from 0 to 37%. Since hypoglycemia and loss to follow-up have been shown to be associated (19,26), differential follow-up of patients prone to hypoglycemia would lead to underestimation of the absolute rates of hypoglycemia in all studies and might also change the differential effect between groups in those studies with a large percentage of patients lost to follow-up.

Follow-up time was short in the majority of studies, limiting the power to detect differences in cardiovascular event rates.

**Limitations of overall review.** We did not include studies published in languages other than English in our review. The lack of inclusion of non-English arti-

cles has been identified as a source of bias in some circumstances (35). However, a recent retrospective analysis suggests that excluding trials published in languages other than English has generally little effect on summary treatment effect estimates (36).

There was a paucity of studies with larger SEs to the left of the point estimate in the funnel plot. Larger SEs can be due to either smaller sample size trials, studies with more variability, or both. This may suggest publication bias or a systematic error introduced by the loss to follow-up.

Statistically significant and clinically important results were obtained for the meta-analyses of all episodes of hypoglycemia, most of which would likely have been minor. Though the clinical importance of minor hypoglycemia can be questioned, minor hypoglycemia has been shown to predict major hypoglycemia (37), and minor episodes lead to disruptions in glycemic control (38,39) that are thought to have long-term consequences (40). Although power to detect a difference in the analysis of major hypoglycemia was limited by the low number of studies reporting this outcome, seven of the eight major hypoglycemic episodes reported occurred in glyburide-treated patients (14,15). UKDPS 33 results, which were not reported in a format that enabled us to include them in the meta-analysis, also show consistency between major episodes and all episodes in the direction and magnitude of the RR when glyburide is compared with chlorpropamide (see above), lending weight to the hypothesis that minor episodes may be a useful surrogate for more clinically important major episodes.

Because all of our comparisons are with glyburide, we are unable to draw any conclusions about the properties of other drugs compared with one another.

Finally, statistical heterogeneity was noted between the studies comparing the risk of at least one hypoglycemic episode in people taking glyburide compared with those taking other secretagogues. Despite this statistical heterogeneity, visual inspection shows that glyburide consistently caused more hypoglycemia than other secretagogues. This statistical heterogeneity most likely results from the relatively tight CI around the UKPDS 13. Indeed, when the UKPDS data were removed from the analysis, the studies were deemed homogenous without a significant change in the overall estimate ( $P$  value increased from 0.06 to 0.64 and  $I^2$

decreased from 42.1 to 0% with the overall RR estimate changing from 1.52 to 1.33, both statistically significant).

### Implications for practice

In 2003, it was estimated that 13.8 million people in the U.S. had established type 2 diabetes; of these, 7.8 million people used at least one oral antidiabetes medication (41). Glyburide, available as a generic, is relatively inexpensive and widely used. Our results suggest that risk of hypoglycemia and rates of hypoglycemia for millions of patients are likely ~50% higher in those taking glyburide than they would be if they were taking an alternative sulfonylurea or nonsulfonylurea secretagogue.

### Implications for research

Our review highlights the importance of minimizing loss to follow-up in RCTs of long duration, as our overall estimates included some clinical trials in which loss to follow-up exceeded 20%. The clinical consequences of hypoglycemia, its effects on patient compliance, and the direct health care costs of hypoglycemia are all important issues that warrant inclusion in an economic evaluation of the relative cost-effectiveness of glyburide compared with other secretagogues.

**Acknowledgments**—A.S.G. is a recipient of the Kidney Foundation of Canada/Canadian Society of Nephrology Fellowship Award. H.C.G. holds the Population Health Institute Chair in Diabetes Research (funded by Aventis).

We thank Neera Bhatnagar for assistance with database searching.

### References

1. Wild S, Roglic G, Green A, Sicree R, King H: Global prevalence of diabetes: estimates for the year 2000 and projections for 2030. *Diabetes Care* 27:1047–1053, 2004
2. Intensive blood-glucose control with sulphonylureas or insulin compared with conventional treatment and risk of complications in patients with type 2 diabetes (UKPDS 33): UK Prospective Diabetes Study (UKPDS) Group. *Lancet* 352:837–853, 1998
3. Asplund K, Wiholm BE, Lithner F: Glibenclamide-associated hypoglycaemia: a report on 57 cases. *Diabetologia* 24:412–417, 1983
4. Seltzer HS: Drug-induced hypoglycemia: a review of 1418 cases. *Endocrinol Metab Clin North Am* 18:163–183, 1989
5. Aguilar-Bryan L, Nichols CG, Wechsler

- SW, Clement JP, Boyd AEA III, Gonzalez G, Herrera-Sosa H, Nguy K, Bryan J, Nelson DA: Cloning of the beta cell high-affinity sulfonylurea receptor: a regulator of insulin secretion. *Science* 268:423–426, 1995
6. Inzucchi SE: Oral antihyperglycemic therapy for type 2 diabetes: scientific review. *JAMA* 287:360–372, 2002
7. Harrower AD: Comparative tolerability of sulphonylureas in diabetes mellitus. *Drug Saf* 22:313–320, 2000
8. The University Group Diabetes Program: A study of the effects of hypoglycemic agents on vascular complications in patients with adult-onset diabetes. V. Evaluation of pheniformin therapy. *Diabetes* 24 (Suppl. 1):65–184, 1975
9. Howes LG: Cardiovascular effects of sulphonylureas: role of K(ATP) channels. *Diabetes Obes Metab* 2:67–73, 2000
10. Klepzig H, Kober G, Matter C, Luus H, Schneider H, Boedeker KH, Kiowski W, Amann FW, Gruber D, Harris S, Burger W: Sulfonylureas and ischaemic preconditioning: a double-blind, placebo-controlled evaluation of glimepiride and glibenclamide. *Eur Heart J* 20:439–446, 1999
11. Moher D, Cook DJ, Eastwood S, Olkin I, Rennie D, Stroup DF: Improving the quality of reports of meta-analyses of randomised controlled trials: the QUOROM statement: Quality of Reporting of Meta-analyses. *Lancet* 354:1896–1900, 1999
12. Robinson KA, Dickersin K: Development of a highly sensitive search strategy for the retrieval of reports of controlled trials using PubMed. *Int J Epidemiol* 31:150–153, 2002
13. Baba S, Nakagawa S, Takebe K, Goto Y, Maezawa H, Takeda R, Sakamoto N, Fukui I: Comparison of gliclazide and glibenclamide treatment in non-insulin-dependent diabetes. *Tohoku J Exp Med* 141 (Suppl.):693–706, 1983
14. Clarke BF, Campbell IW: Long-term comparative trial of glibenclamide and chlorpropamide in diet-failed, maturity-onset diabetes. *Lancet* 1:246–248, 1975
15. Draeger KE, Wernicke-Panten K, Lomp HJ, Schuler E, Roskamp R: Long-term treatment of type 2 diabetic patients with the new oral antidiabetic agent glimepiride (Amaryl): a double-blind comparison with glibenclamide. *Horm Metab Res* 28:419–425, 1996
16. Dills DG, Schneider J: Clinical evaluation of glimepiride versus glyburide in NIDDM in a double-blind comparative study: Glimepiride/Glyburide Research Group. *Horm Metab Res* 28:426–429, 1996
17. Haider Z, Obaidullah S, Fayyaz uD: Comparative study of glibenclamide & chlorpropamide in newly diagnosed maturity onset diabetics. *J Pak Med Assoc* 26:23–26, 1976
18. Herz M, Sun B, Milicevic Z, Erickson P, Fovenyi J, Grzywa M, Pelikanova T: Comparative efficacy of preprandial or postprandial Humalog Mix75/25 versus glyburide in patients 60 to 80 years of age with type 2 diabetes mellitus. *Clin Ther* 24:73–86, 2002
19. Hollander PA, Schwartz SL, Gatlin MR, Haas SJ, Zheng H, Foley JE, Dunning BE: Importance of early insulin secretion: comparison of nateglinide and glyburide in previously diet-treated patients with type 2 diabetes. *Diabetes Care* 24:983–988, 2001
20. Landgraf R, Bilo H, Muller P: A comparison of repaglinide and glibenclamide in the treatment of type 2 diabetic patients previously treated with sulphonylureas. *Eur J Clin Pharmacol* 55:165–171, 1999
21. Marbury T, Huang WC, Strange P, Lebovitz H: Repaglinide versus glyburide: a one-year comparison trial. *Diabetes Res Clin Pract* 43:155–166, 1999
22. Roach P, Koledova E, Metcalfe S, Hultman C, Milicevic Z, the Romania/Russia Mix25 Study Group: Glycemic control with Humalog Mix 25 in type 2 diabetes inadequately controlled with glyburide. *Clin Ther* 23:1732–1744, 2001
23. Rosenstock J, Corrao PJ, Goldberg RB, Kilo C: Diabetes control in the elderly: a randomized, comparative study of glyburide versus glipizide in non-insulin-dependent diabetes mellitus. *Clin Ther* 15:1031–1040, 1993
24. Schmitt JK: Clinical comparison of glipizide and glyburide (Letter). *Diabetes Care* 12:39, 1989
25. Wolffenbuttel BH, Landgraf R: A 1-year multicenter randomized double-blind comparison of repaglinide and glyburide for the treatment of type 2 diabetes: Dutch and German Repaglinide Study Group. *Diabetes Care* 22:463–467, 1999
26. Mafauzy M: Repaglinide versus glibenclamide treatment of type 2 diabetes during Ramadan fasting. *Diabetes Res Clin Pract* 58:45–53, 2002
27. UK Prospective Diabetes Study (UKPDS) 13: Relative efficacy of randomly allocated diet, sulphonylurea, insulin, or metformin in patients with newly diagnosed non-insulin dependent diabetes followed for three years. *BMJ* 310:83–88, 1995
28. Harrower AD: Comparison of diabetic control in type 2 (non-insulin dependent) diabetic patients treated with different sulphonylureas. *Curr Med Res Opin* 9:676–680, 1985
29. Harrower AD: Comparison of efficacy, secondary failure rate, and complications of sulphonylureas. *J Diabetes Complications* 8:201–203, 1994
30. Hamblin JJ, Ismay G, Good MS, Wynne-Williams CJ, Baum G, Wilson IV: A comparative study of glibenclamide and chlorpropamide (preliminary report). *Postgrad Med J (Suppl.):*92–94, 1970
31. Forst T, Eriksson JW, Strotmann HJ, Bai S, Brunelle R, Gulliyya KS, Gack S, Gudat U: Metabolic effects of mealtime insulin lispro in comparison to glibenclamide in early type 2 diabetes. *Exp Clin Endocrinol Diabetes* 111:97–103, 2003
32. Ciccarone A, Cecchetti P, Orsini P, Di Cianni G, Coppini A, Merante D, Navalesi R, Benzi L: Effects of glimepiride and glibenclamide on metabolic response and insulin receptor interaction in monocytes from patients with type 2 diabetes mellitus. *Curr Ther Res Clin Exp* 60:314–325, 1999
33. Holstein A, Plaschke A, Egberts EH: Lower incidence of severe hypoglycaemia in patients with type 2 diabetes treated with glimepiride versus glibenclamide. *Diabetes Metab Res Rev* 17:467–473, 2001
34. Kjaergard LL, Villumsen J, Gluud C: Reported methodologic quality and discrepancies between large and small randomized trials in meta-analyses. *Ann Intern Med* 135:982–989, 2001
35. Egger M, Juni P, Bartlett C, Hohenstein F, Sterne J: How important are comprehensive literature searches and the assessment of trial quality in systematic reviews? Empirical study. *Health Technol Assess* 7:1–76, 2003
36. Juni P, Hohenstein F, Sterne J, Bartlett C, Egger M: Direction and impact of language bias in meta-analyses of controlled trials: empirical study. *Int J Epidemiol* 31: 115–123, 2002
37. Kovatchev BP, Cox DJ, Farhy LS, Straume M, Gonder-Frederick L, Clarke WL: Episodes of severe hypoglycemia in type 1 diabetes are preceded and followed within 48 hours by measurable disturbances in blood glucose. *J Clin Endocrinol Metab* 85:4287–4292, 2000
38. Cryer PE, Fisher JN, Shamoon H: Hypoglycemia. *Diabetes Care* 17:734–755, 1994
39. Cryer PE: Banting Lecture: Hypoglycemia: the limiting factor in the management of IDDM. *Diabetes* 43:1378–1389, 1994
40. Cryer PE: Diverse causes of hypoglycemia-associated autonomic failure in diabetes. *N Engl J Med* 350:2272–2279, 2004
41. Centers for Disease Control and Prevention: *National Diabetes Fact Sheet: General Information and National Estimates on Diabetes in the United States*, 2003. Rev. ed. Atlanta, GA, U.S. Department of Health and Human Services, Centers for Disease Control and Prevention, 2004
